# Supplementary material for: Quantitative mass spectrometry imaging of glutathione in healthy and cancerous hen ovarian tissue sections by infrared matrix-assisted laser desorption electrospray ionization (IR-MALDESI)
Source: Royal Society of Chemistry journal article supplement (doi:10.1039/c7an01828b), 2018-01-01
Supplement: c7an01828b1.pdf [file c7an01828b1.pdf]

# Quantitative Mass Spectrometry Imaging of Glutathione in Healthy and Cancerous Hen Ovarian Tissue Sections by Infrared Matrix-Assisted Laser Desorption Electrospray Ionization (IR-MALDESI)

Milad Nazari<sup>1</sup>, Mark T. Bokhart<sup>1</sup>, Philip L. Loziuk<sup>1</sup>, and David C. Muddiman<sup>1</sup>

<sup>1</sup>Department of Chemistry and Molecular Education, Technology, and Research Innovation Center (METRIC), North Carolina State University, Raleigh, NC 27695,

## Electronic Supplementary Information

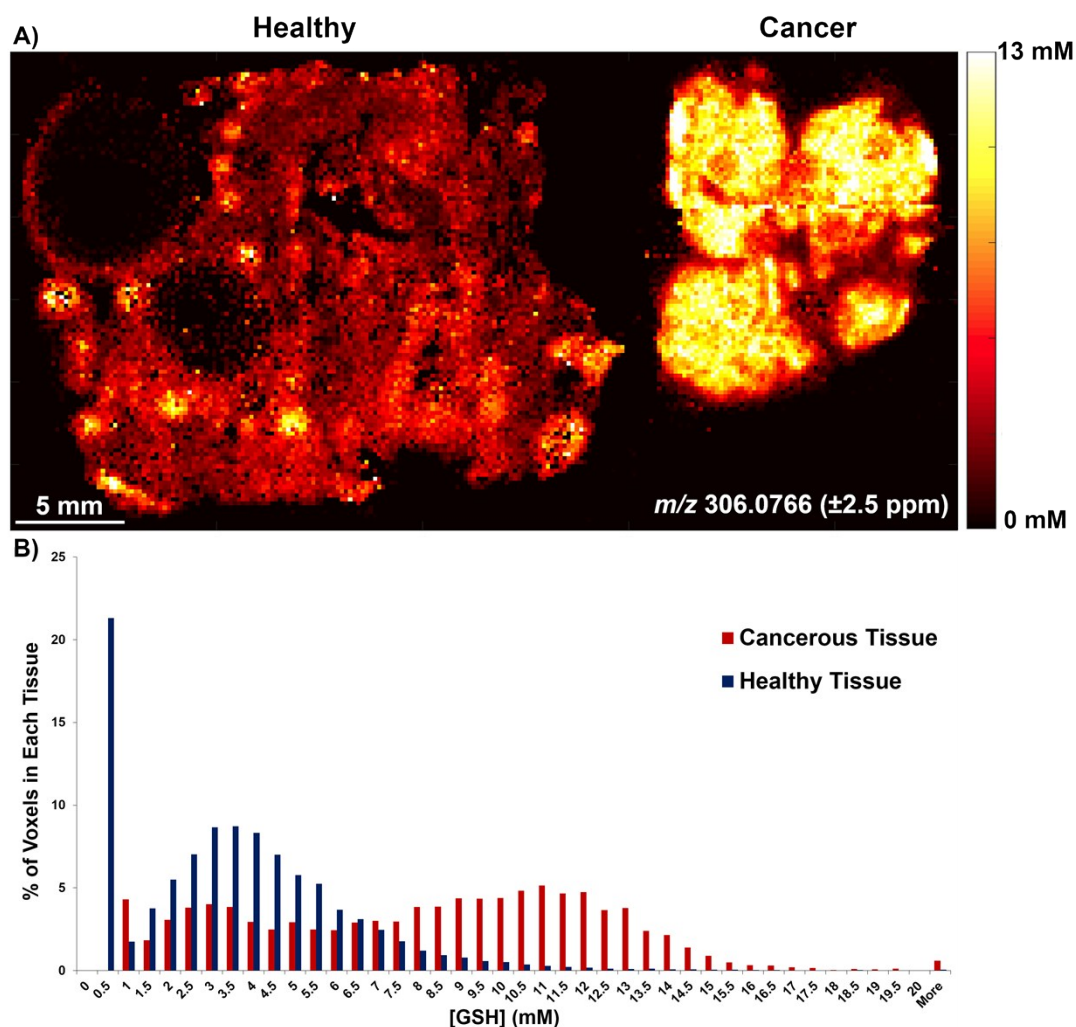

**Figure S1.** Concentration heatmaps of GSH in healthy and cancerous tissue sections (A) and the histograms of concentration frequency in % of total voxels in each tissue (B), demonstrating the heterogeneity of GSH concentration across each tissue section. The % voxels in each tissue are shown in the y-axis of histograms since the absolute number of voxels in tissues varied significantly due to the difference in sizes of the tissues.

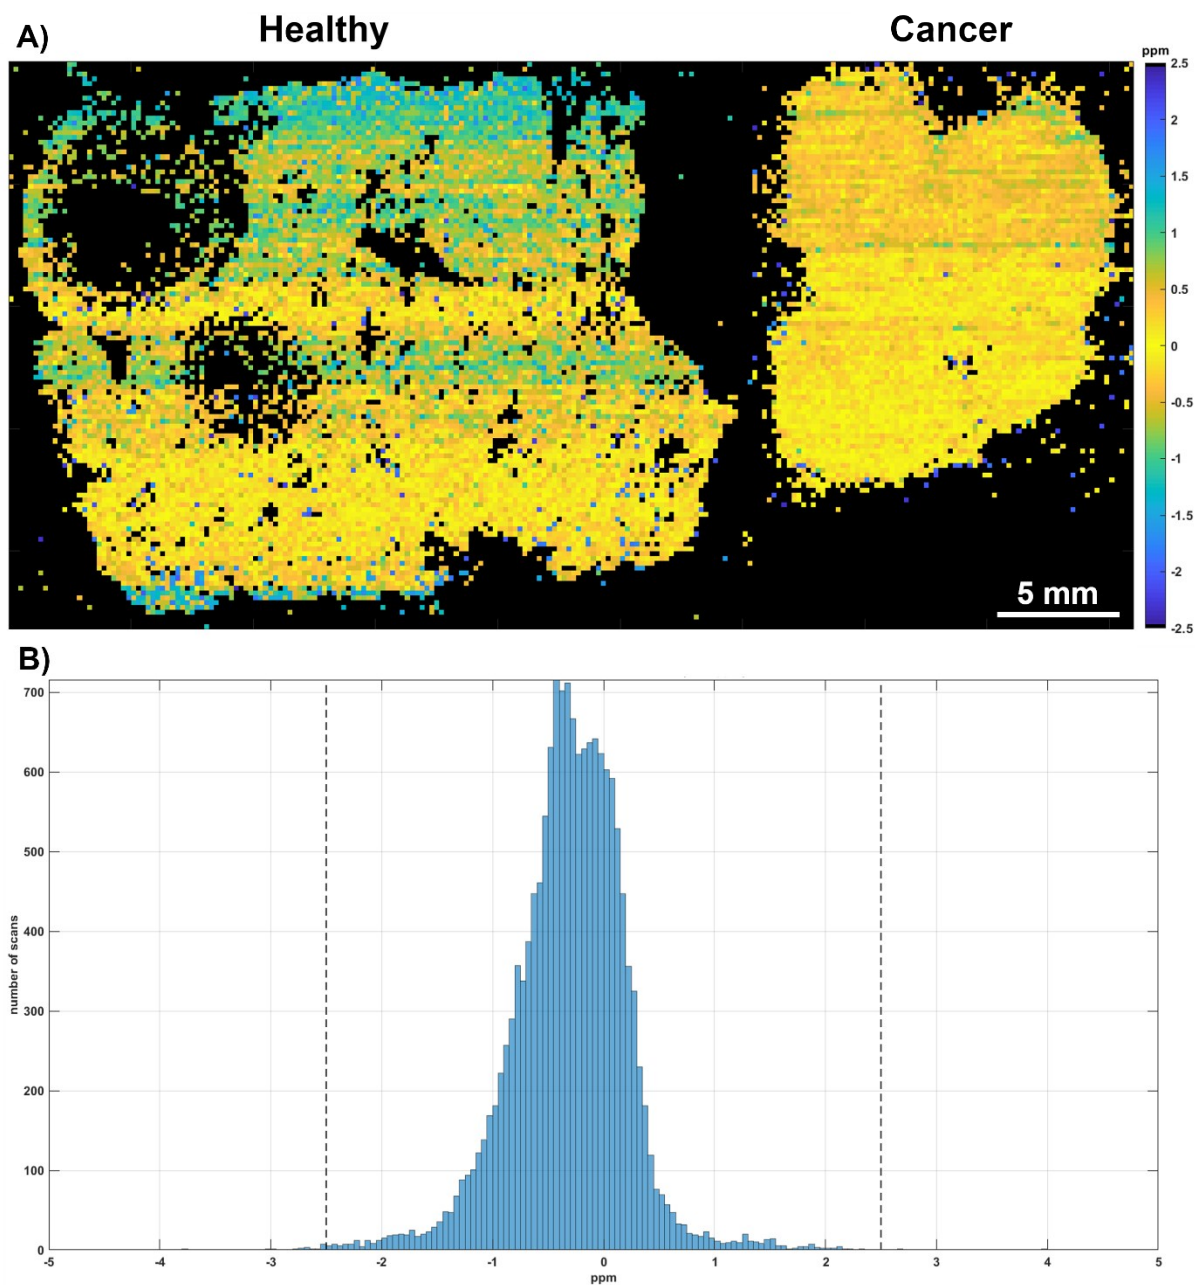

**Figure S2. A)** MMA heatmaps of endogenous GSH ( $m/z$  306.0766) in healthy and cancerous hen ovarian tissue sections, **B)** histogram of the MMA for all scans across the region of interest. The dashed lines indicate the  $\pm 2.5$  ppm tolerance used for generating ion images. It can be seen that the MMA of GSH falls in this 5 ppm window.

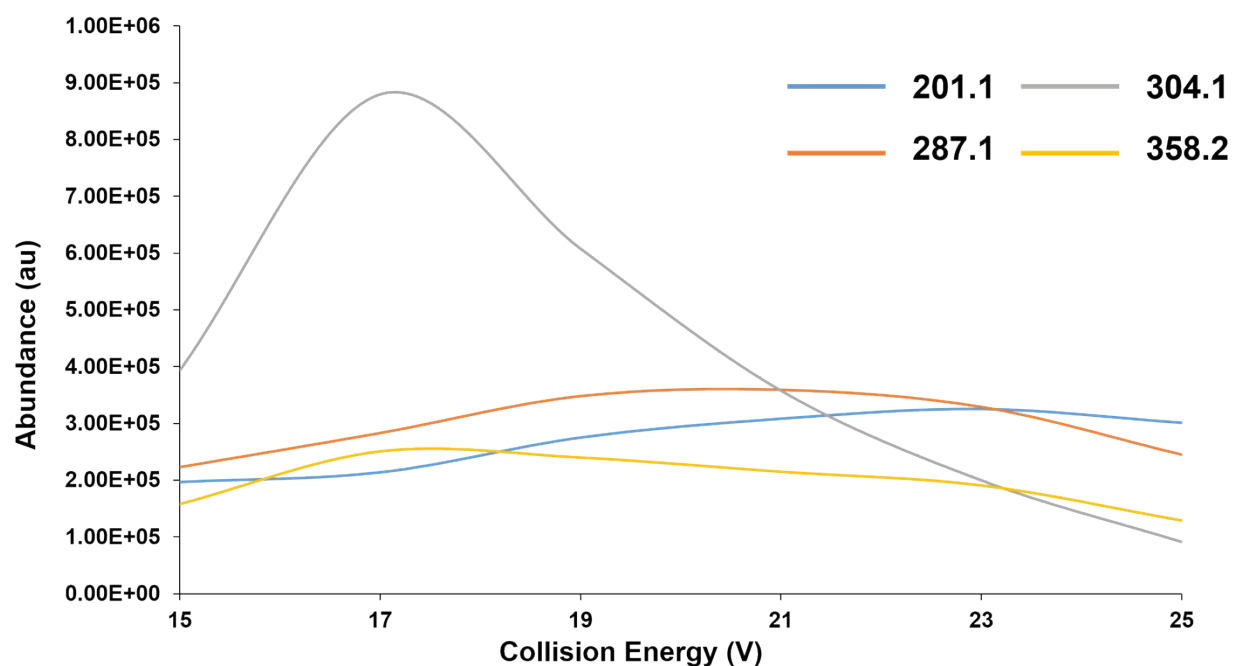

| NAT GSH-NEM Transition | Collision Energy (V) |
|------------------------|----------------------|
| 433.1 → 201.1          | 23                   |
| 433.1 → 287.1          | 20                   |
| 433.1 → 304.1          | 17                   |
| 433.1 → 358.2          | 17                   |

**Figure S3.** Top: breakdown curves showing the abundance of 4 different transitions of NAT GSH-NEM as collision energy (CE) increases. Bottom: the optimized CE for each transition chosen based on these data.
